# Supplementary material for: Duplicate gene expression in allopolyploid Gossypiumreveals two temporally distinct phases of expression evolution
Source: Springer Nature journal article supplement (doi:10.1186/1741-7007-6-16), 2008-04-16

## **Supplemental Material**

### **SI Methods:**

#### **Microarray Design:**

Homoeolog-specific probes were created by first assembling EST contigs from A<sub>2</sub>, D<sub>5</sub>, and AD<sub>1</sub> (Table 1) libraries and then identifying homoeolog-specific SNPs within these contigs. These SNPs represent nucleotide differences between the A and D genome orthologs, and offer the possibility of diagnosing the genomic origin of transcripts in the allopolyploid nucleus. Additionally, when available, AD<sub>1</sub> EST sequences confirmed the conservation of A- and D-genome-specific SNPs in the allopolyploid species. Using this strategy, 11,399 high-quality SNPs were identified, encompassing 2029 contigs. For each of these 11,399 SNPs, complimentary plus and minus strand A and D homoeolog-specific probes sets were designed, generating in total 22,798 probes sets, and 45,596 unique probes.

#### **Mass-Spectrometry Validation Experimental Design and Methodology:**

Cotton petal RNA samples were converted to cDNA and PCR amplified with multiplex primer sets, which targeted 13 genes from the homoeolog-specific microarray results. Each biological replicate was split into three technical replicates resulting in 9 total replicate measures for each species (3 bio. reps. X 3 tech. reps.). Amplified multiplex products were sent to the University of Minnesota for homoeolog-specific MALDI-TOF mass-spectrometry quantification using a Sequenom (San Diego, CA) MassARRAY device. The mean value for each of the nine replicates was determined and compared to the estimates derived from the homoeolog-specific microarray (Supp. Fig. 3)

Supp. Table 1. A- and D-genome contribution to the transcriptome at FDR thresholds of 0.05 (A) and 0.1 (B). Each gene pair categorized based on a linear model analysis of three replicate measures of genomic contribution. “Shared genes” are those with expression patterns that are conserved between *G. hirsutum* and the diploid hybrid.

Supp. Figure 1. Principle Component Analysis of natural log differences between A- and D-genome specific probe expression levels. All three replicate samples of each genotype are represented. Character symbols for the five genomic samples are as follows: “A” = A<sub>2</sub>, “D” = D<sub>5</sub>, “F” = F<sub>1</sub> hybrid, “M” = 1:1 A<sub>2</sub>:D<sub>5</sub> RNA mix, and “P” = AD<sub>1</sub> allotetraploid. The proportion of the total variance explained by each principle component is listed on the corresponding axis.

Supp. Figure 2. Validation of homoeolog expression results for AD<sub>1</sub> and F<sub>1</sub> accessions. (A) A comparison of results for 13 randomly chosen genes. All NimbleGen (microarray) values are expressed as the log ratio ( $\ln(A_{\text{probe}}) - \ln(D_{\text{probe}})$ ), whereas the Sequenom (mass-spectrometry) values are expressed as the proportion of the transcriptome contributed by the A-genome. Thus both metrics result in analogous interpretations of the different data types (ie. for both technologies, larger values reflect greater A-genome contribution to the transcriptome, and smaller values reflect greater D-genome contribution). Scatter plots of validation results for AD<sub>1</sub> and F<sub>1</sub> (B) with their associated best-fit line, R<sup>2</sup> value, and *p*-value.

Supp. Table 1A: FDR threshold = 0.05

|        | A-bias | D-bias | Equiv. | Total |
|--------|--------|--------|--------|-------|
| $F_1$  | 37     | 76     | 1270   | 1383  |
| $AD_1$ | 283    | 380    | 720    | 1383  |
| shared | 13     | 47     | 683    | 743   |

Supp. Table 1B: FDR threshold = 0.1

|        | A-bias | D-bias | Equiv. | Total |
|--------|--------|--------|--------|-------|
| $F_1$  | 76     | 186    | 1121   | 1383  |
| $AD_1$ | 358    | 472    | 553    | 1383  |
| shared | 33     | 112    | 483    | 628   |

Supp. Figure 1:

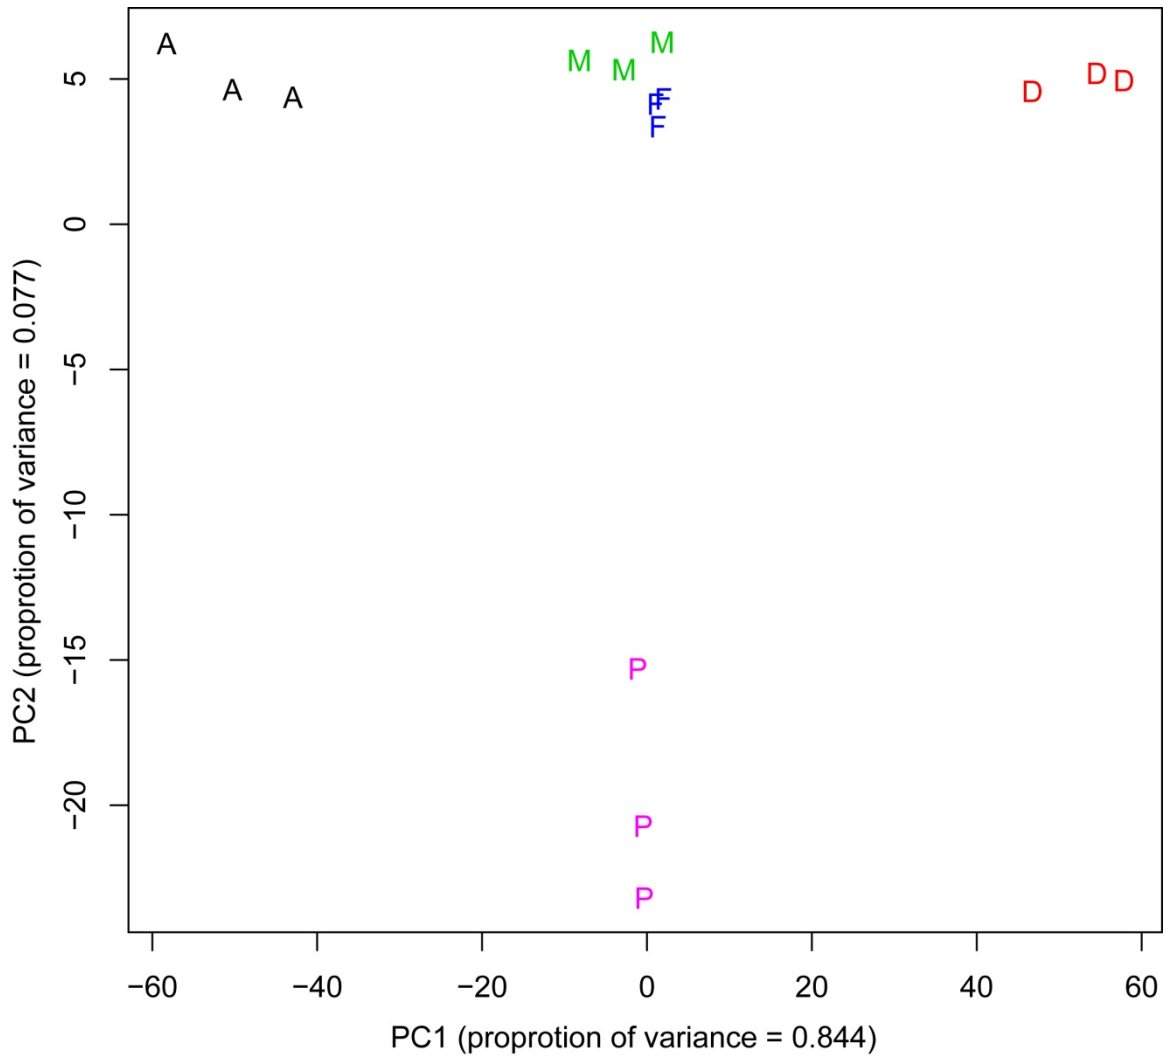

1 Supp. Figure 2A:

2

| contig             | SNP position | AD1 Sequenom % A | AD1 NimbleGen ln(a) - ln(d) | F1 Sequenom % A | F1 NimbleGen ln(a) - ln(d) |
|--------------------|--------------|------------------|-----------------------------|-----------------|----------------------------|
| COTTON16_00001_062 | 1928         | 0.543            | 0.728                       | 0.549           | 0.551                      |
| COTTON16_00024_03  | 2070         | 0.293            | -0.867                      | 0.097           | -0.766                     |
| COTTON16_00076_06  | 860          | NA               | NA                          | 0.449           | -0.448                     |
| COTTON16_00174_02  | 802          | 0.734            | 0.562                       | 0.408           | -0.251                     |
| COTTON16_00285_02  | 685          | 0.425            | 0.09                        | 0.395           | 0.343                      |
| COTTON16_00690_02  | 916          | 0.469            | 0.725                       | 0.384           | -0.946                     |
| COTTON16_01391_01  | 705          | 0.607            | 0.01                        | 0.554           | 0.059                      |
| COTTON16_07872_01  | 1017         | 0.311            | -0.632                      | 0.255           | -0.405                     |
| COTTON16_07872_01  | 1185         | 0.313            | -0.66                       | 0.21            | -0.433                     |
| COTTON16_09095_01  | 1544         | 0.504            | 0.59                        | 0.586           | 0.691                      |
| COTTON16_21601_01  | 747          | 0.557            | 0.026                       | 0.515           | 0.04                       |
| COTTON16_25466_01  | 1125         | 0.482            | 0.425                       | 0.531           | -0.412                     |
| COTTON16_32946_01  | 1145         | 0.702            | -0.067                      | 0.564           | -0.107                     |

3

4

5

6 Supp. Figure 2B:

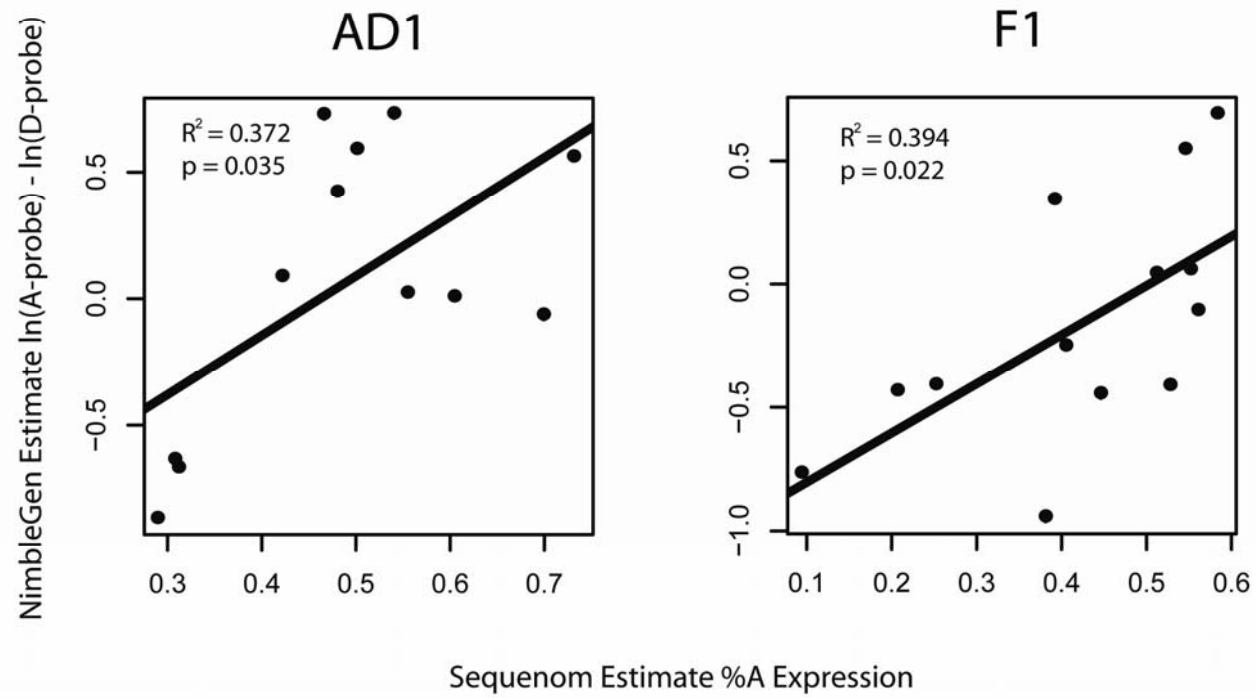

Supplement: Additional file 1 [file 1741-7007-6-16-s1.pdf]
